# Supplementary material
Source: publisher site journal article supplement (https://www.degruyterbrill.com/publication/isbn/9783110222555/downloadAsset/9783110222555_Korrekturen.pdf)

## Buch: Chemische Thermodynamik (Walter Schreiter)

### Errata und Ergänzungen zur 1. Auflage

ISBN 978-3-11-022254-8, De Gruyter , erschienen Mai 2010

Leider bleibt es selbst bei sorgfältigster Recherche nicht aus, dass sich in einem Buch auch einige Fehler und Versäumnisse einschleichen. Dies gilt umso mehr, als es sich um ein relativ kompliziertes Stoffgebiet „Thermodynamik“ handelt. Für nachfolgende Fehler und Versäumnisse, die in einer möglichen Folgeauflage selbstverständlich korrigiert werden, bitte ich als Autor um Entschuldigung und Nachsicht.

#### • Fehlende Angabe im Literaturverzeichnis:

*Heintz, A. , Vorlesung " Chem. Thermodynamik für Physiker" , Webseite der Uni. Rostock*

**Richtigstellungen** sind *rot markiert*

S. 25 Tab.1.1 In Kopfzeile ----->  $dS = \frac{\delta Q_{rev}}{T} + \frac{\delta I_{rev.}}{T}$  ( $\delta I \geq 0$ )

S. 31 + 33 Korrektur der Maßeinheit von  $\Delta S$  im Ergebnis der Rechnungen => **J/K**

S. 88 In Abb.1.37c -----> fehlender Teil der Senkrechten von Punkt D zur Abszisse und genauere Positionierung von  $AB_2$

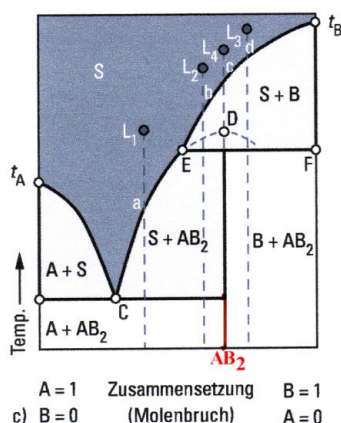

S. 138 Nr. 20 In erster Gleichung fehlender Index--->  $dp = \left(\frac{\partial p}{\partial T}\right)_v dT + \left(\frac{\partial p}{\partial V}\right)_T dV$

S. 154 Nr. 44 In letzter Wortzeile einfügen ----> ....wie folgt (**n= 1mol**) :

$$S. 159 \text{ Z. 5 v.o.} \quad \left[ \frac{\partial(\Delta H)}{\partial T} \right]_p = \left[ \frac{\partial H_B}{\partial T} \right]_p - \left[ \frac{\partial H_A}{\partial T} \right]_p$$

S. 174 Nr.75 , in 3.Gl. rechts v.o. ----->  $TdS = dH - Vdp$

S. 175 In 2. Gl. zeile v.u. :

$$\left(\frac{\partial S}{\partial T}\right)_T = \frac{p}{T} = \frac{R}{V} \rightarrow \int_{S_1}^{S_2} dS = R \int_{V_1}^{V_2} \frac{dV}{V} \rightarrow \boxed{\Delta S = S_2 - S_1 = R \ln \frac{V_2}{V_1}}$$

$\nwarrow$   $\delta V$

S. 176 Nr.76, Letzte Gl. rechts ----->  $\boxed{\left(\frac{\partial S}{\partial p}\right)_T = -\left(\frac{\partial V}{\partial T}\right)_p} = -\alpha V = -\frac{V}{T} = -\frac{R}{p}$

am Ende von Nr.76 **neue Zeile mit Ergänzung von zwei fehlenden Maxwell-Relationen:**

$$\longrightarrow \boxed{\left(\frac{\partial V}{\partial S}\right)_p = \left(\frac{\partial T}{\partial p}\right)_S} \quad \left| \quad \boxed{\left(\frac{\partial p}{\partial S}\right)_V = -\left(\frac{\partial T}{\partial V}\right)_S}$$

S. 176 Nr.77, Z. 1 -----> Funktion**en**

S. 187 Nr. 90

**Redoxreaktion**  
**Halbzelle**

$$\boxed{E = E^\circ + \frac{RT}{zF} \ln \frac{C_{OM}}{C_{RM}}}$$

**Reaktion von 2 Halbzellen**

$$\boxed{\Delta E = \Delta E^\circ - \frac{RT}{zF} \ln \frac{C_{Pr od.}}{C_{Ed}}} \quad (I) *$$

$\mid$  **NERNST**

**Säure/Base-Reaktion**  
**Halbzelle**

$$\boxed{pH = pK_s + \lg \frac{C_{B^-}}{C_{HB}}}$$

**Reaktion von 2 Halbzellen**

$$\boxed{\Delta pH = \Delta pK_s + \lg \frac{C_{Pr od.}}{C_{Ed}}} \quad (II) *$$

$\mid$  **HENDERSON-HASSELBALCH**

S.188 In Lös. v.Nr.91.2 heißt es  $\left[\frac{d \ln k}{dT}\right]_p = \frac{E_A}{RT^2}$

S. 198 In Nr. 101, Zeile 15 -----> ...um 1,4 **cm**<sup>3</sup>

S. 247 In Nr.50 ----->**δ**W<sub>O</sub>

S. 249 Nr.61.1 Nach der Aufgabenstellung fehlt -----> **?**

S. 274 Nr.168.2.2 in Z. 4 -----> ..... dies**er** ....

S.287 In Nr. 211. 3a) steht für d) -----> **211.2b)**

S. 360 Z. 7 v.u. -----> ..... +  $\int_{298,15}^{773,15} \frac{\Delta C_p}{T} dT = \dots\dots\dots$

S. 361 7. Zeile v.o. -----> für  $E_{(4)}$  steht **F<sub>(4)</sub>**

S. 364 Nr. 139 , Z. 1 ----->  **$\delta W = -pdV$**

S. 378 Nr. 159.2 Aus RG(I) - RG(II) ~~RG~~ wird RG(III)

S. 388 In Kopfzeile der Tabelle : **richtig ist----**  $\lg \frac{b(a-x)}{a(b-x)}$   $k_1 = \frac{2.303}{t(a-b)} \cdot \lg \frac{b(a-x)}{a(b-x)}$   
 $[s^{-1} \cdot mol^{-1}]$

S. 396 Im Ergebnis von Nr. 178.2 ----->  $\Delta G = - 156,3 \text{ kJ/mol}$

S. 421 In Tab.5.1 Ergänzung für 30 °C von links -----> rechts : **30 30,3 4,24**

S. 446 In Nr. 250 Zeile 1 :

$$\Delta_v G^0 = \sum \Delta_v G_{\text{Produkte}}^0 - \sum \Delta_v G_{\text{Edukte}}^0 \quad \text{----->} \quad \Delta_v G^0 = \sum \Delta_B G_{\text{Produkte}}^0 - \sum \Delta_B G_{\text{Edukte}}^0$$

S. 460 Gl. Harnstoffzyklus -----> ..... + 3 A**TP**<sup>4+</sup> + .... $\rightleftharpoons$  .....

S. 463 Abb. 5.65 Cytochrom c -----> auf dem nach rechts weisenden Pfeil steht **-e<sup>-</sup>**

S. 471 In Abb. 5.70 -----> Elektron**en**transportkette

S. 397 +398 Nr 180 Richtigstellung der 2 Zeilendiagramme, nämlich --->

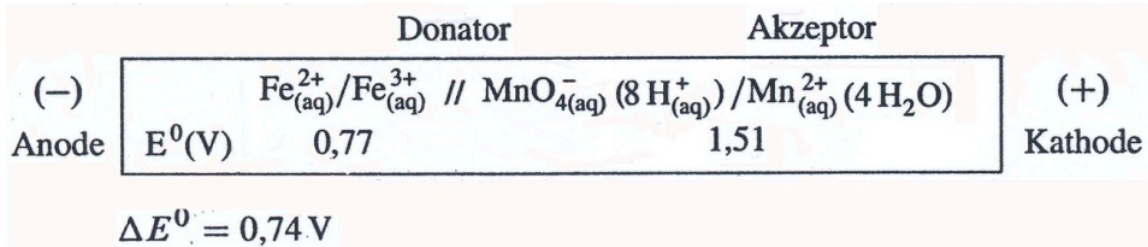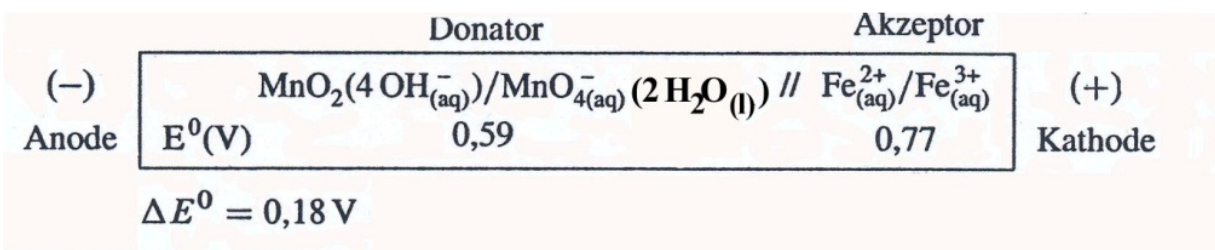

S. 220 (Abb.3.34) + S. 222 (Abb.3.34a) -----> die **Linie CD** ist jeweils teilweise punktiert

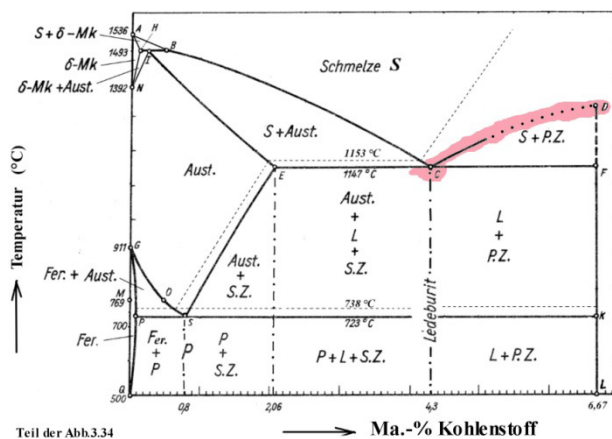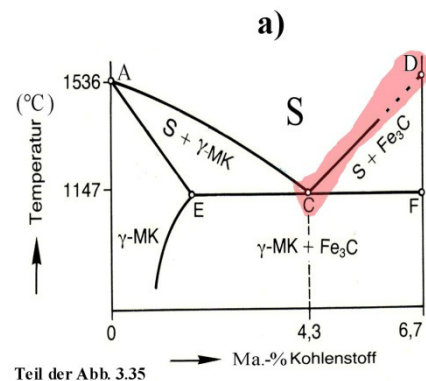

S. 302 Abb. 4.21 -----> richtige Pfeilstellung ist : ( \*)

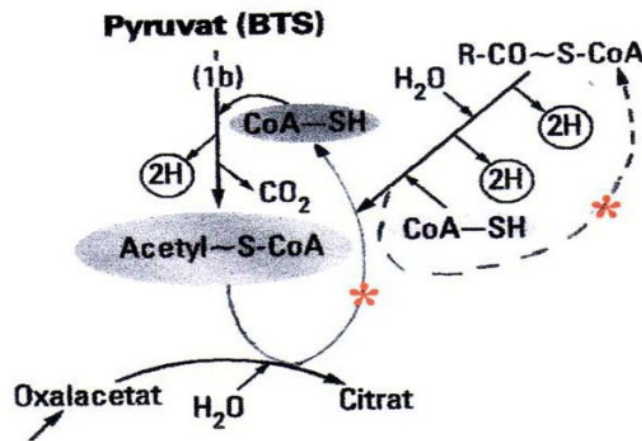

S. 486 In Abb. 6.7 ----> bessere Darstellung der Bindung von Sauerstoff an Häm

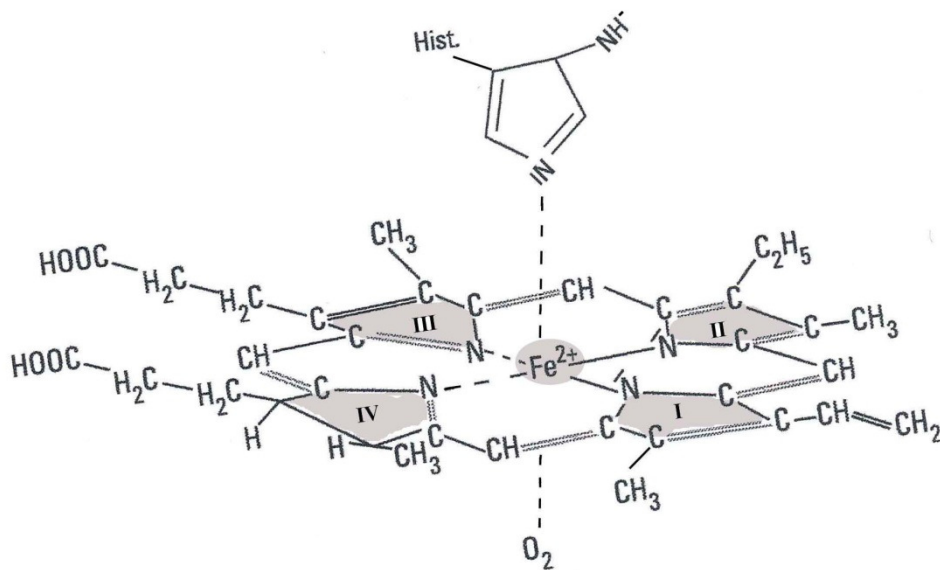

Supplement: Supplementary file 1 [file 9783110222555_Korrekturen.pdf]
